# Supplementary material for: Chemical and Conformational Diversity of Modified Nucleosides Affects tRNA Structure and Function
Source: MDPI journal article supplement (doi:10.3390/biom7010029), 2017-03-16
Supplement: s1 [file s1]

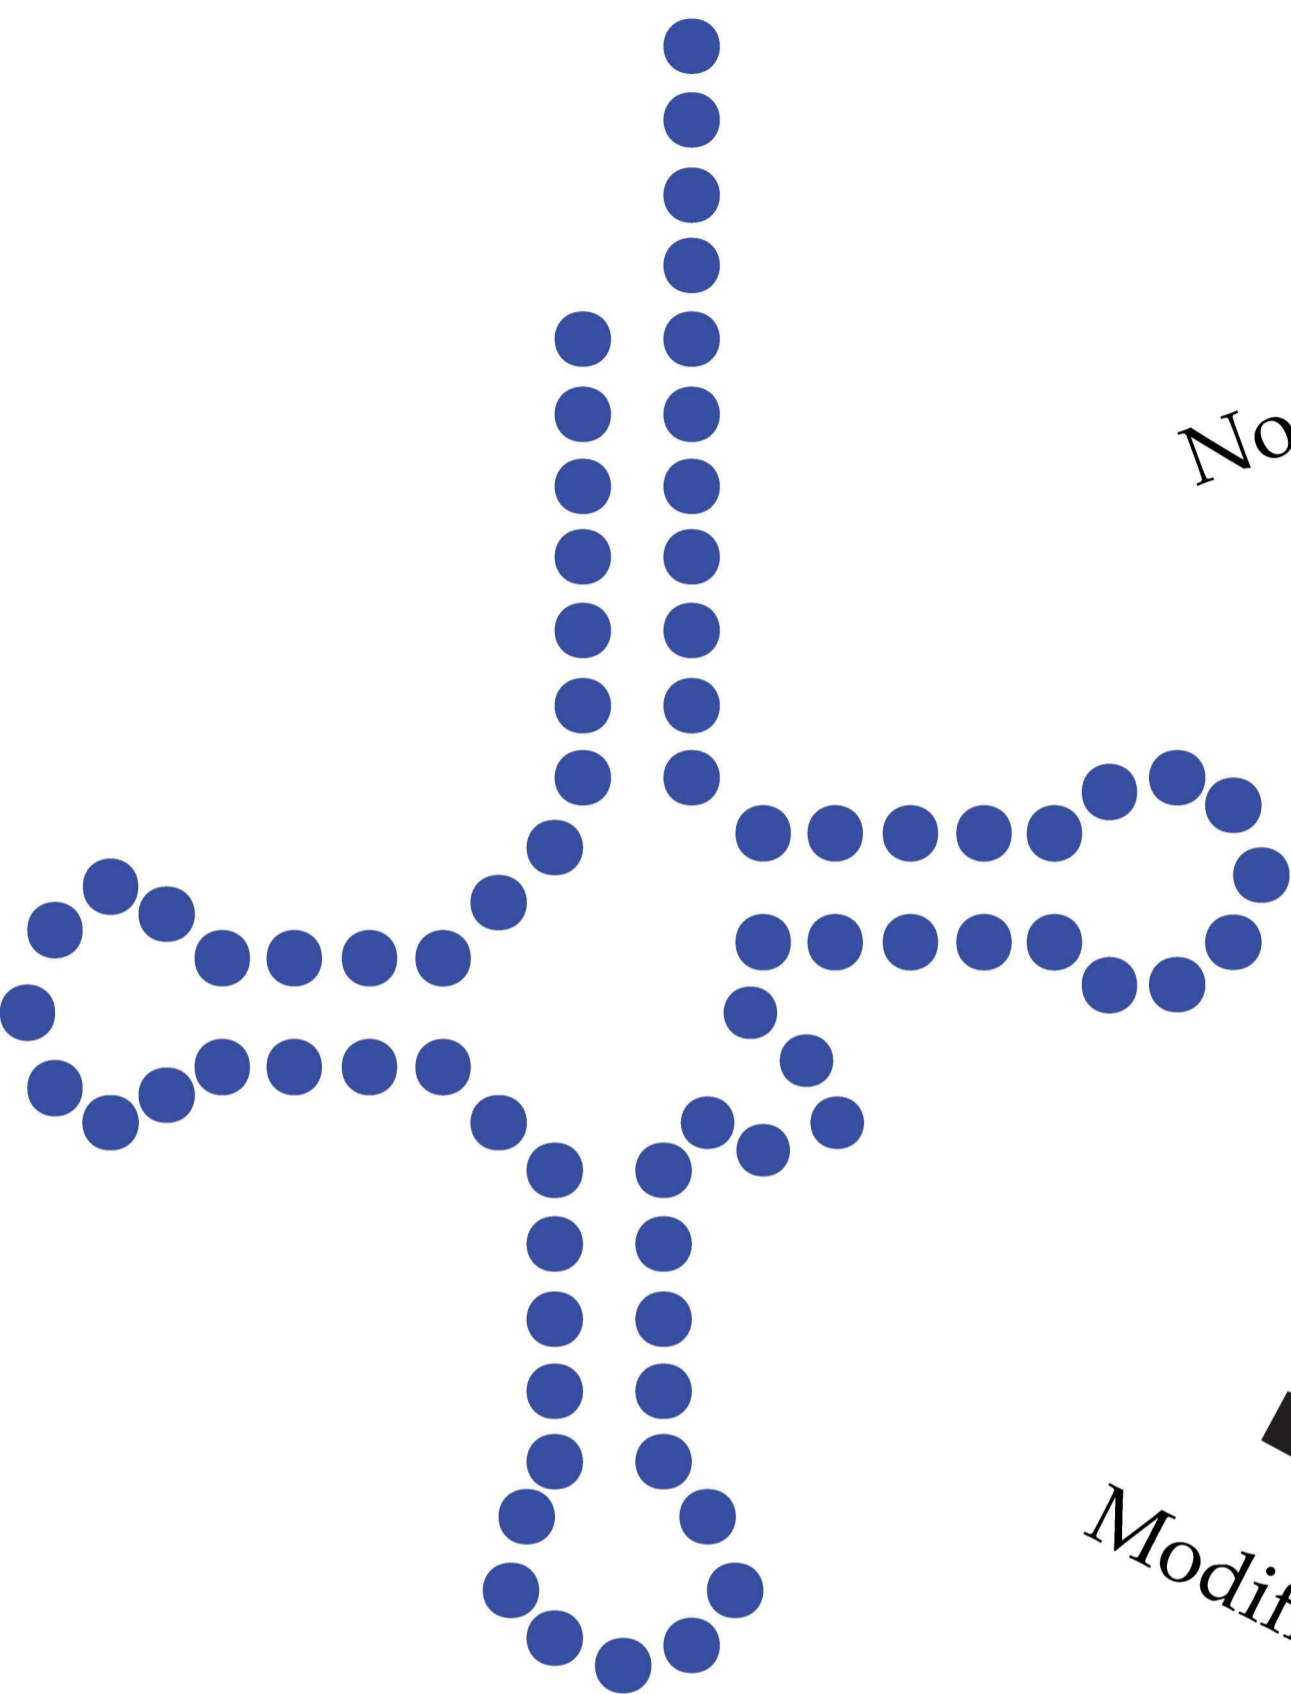

No modifications

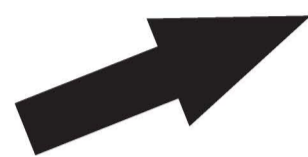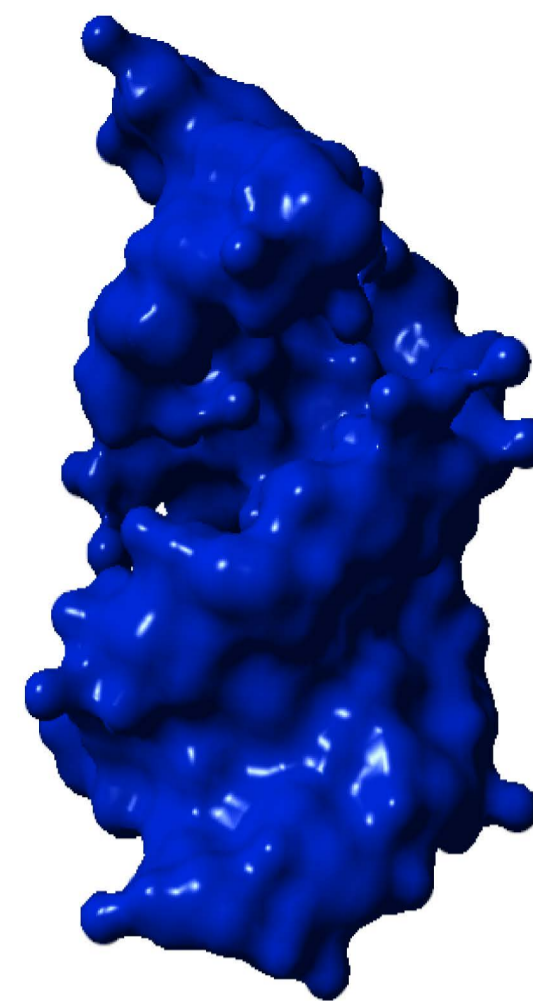

Misfolded tRNA

Modifications

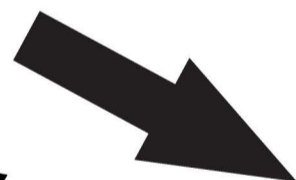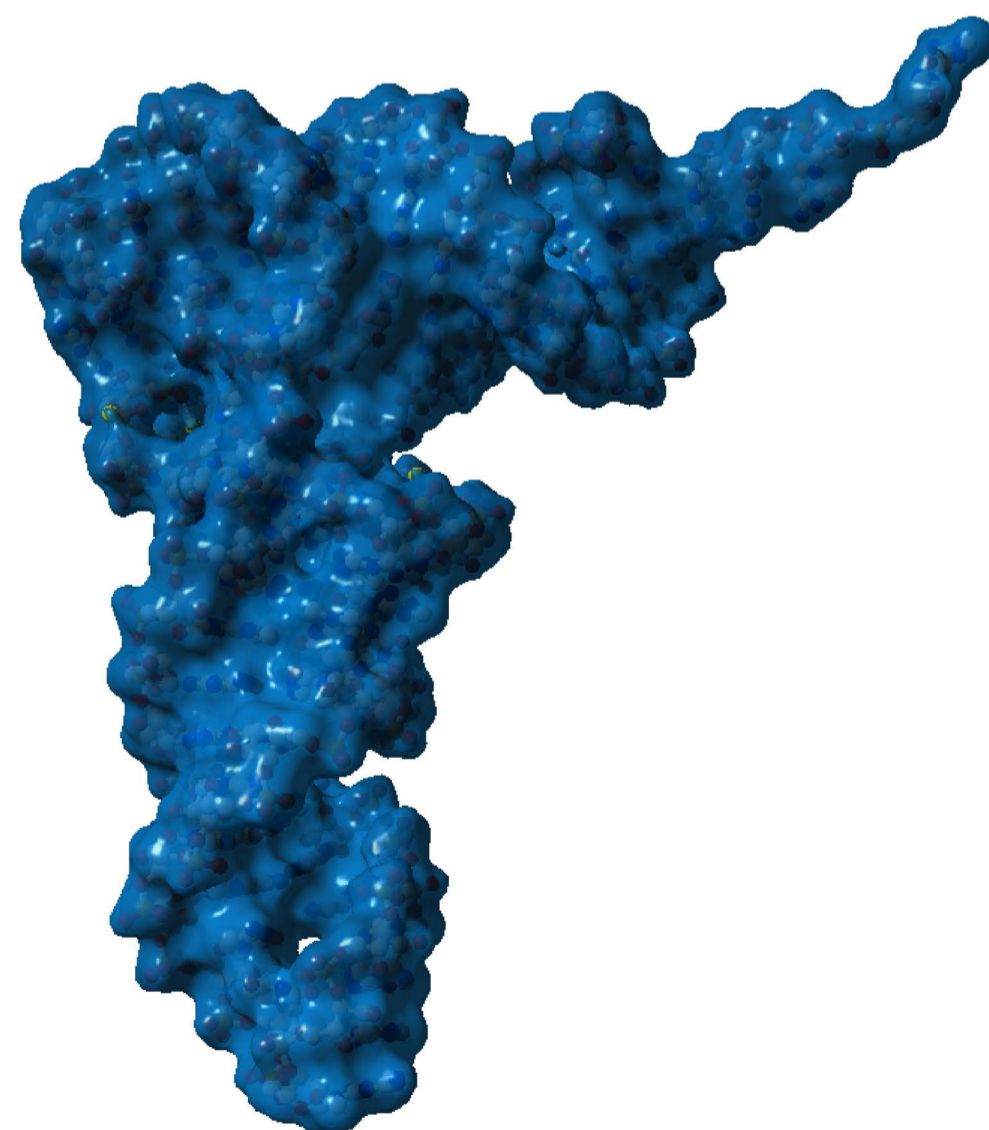

Correctly folded tRNA;  
Structure and function
